# Supplementary material for: Attribution of individual methane and carbon dioxide emission sources using EMIT observations from space
Source: PubMed Central journal article supplement — Sci Adv. 2023 Nov 17;9(46):eadh2391. doi: 10.1126/sciadv.adh2391 (PMC10656068; doi:10.1126/sciadv.adh2391), 2023-11-17
Supplement: sciadv.adh2391_sm.pdf [file sciadv.adh2391_sm.pdf]

Supplementary Materials for  
**Attribution of individual methane and carbon dioxide emission sources using  
EMIT observations from space**

Andrew K. Thorpe *et al.*

Corresponding author: Andrew K. Thorpe, [andrew.k.thorpe@jpl.nasa.gov](mailto:andrew.k.thorpe@jpl.nasa.gov)

*Sci. Adv.* **9**, eadh2391 (2023)  
DOI: 10.1126/sciadv.adh2391

**This PDF file includes:**

Text S1 and S2  
Fig. S1  
Table S1

### Text S1. Spectral fingerprint of methane and carbon dioxide

Methane and carbon dioxide have distinct spectral fingerprints that EMIT can identify, permitting gas retrievals and emission estimates. The spectral fingerprints shown in Fig. S1 were calculated as the ratio of measured radiance within a gas plume divided by radiance outside of the plume. The results for methane (Fig. S1A) and carbon dioxide (Fig. S1B) show excellent agreement with modeled gas transmission (e.g. unit absorption spectra, see Materials and Methods).

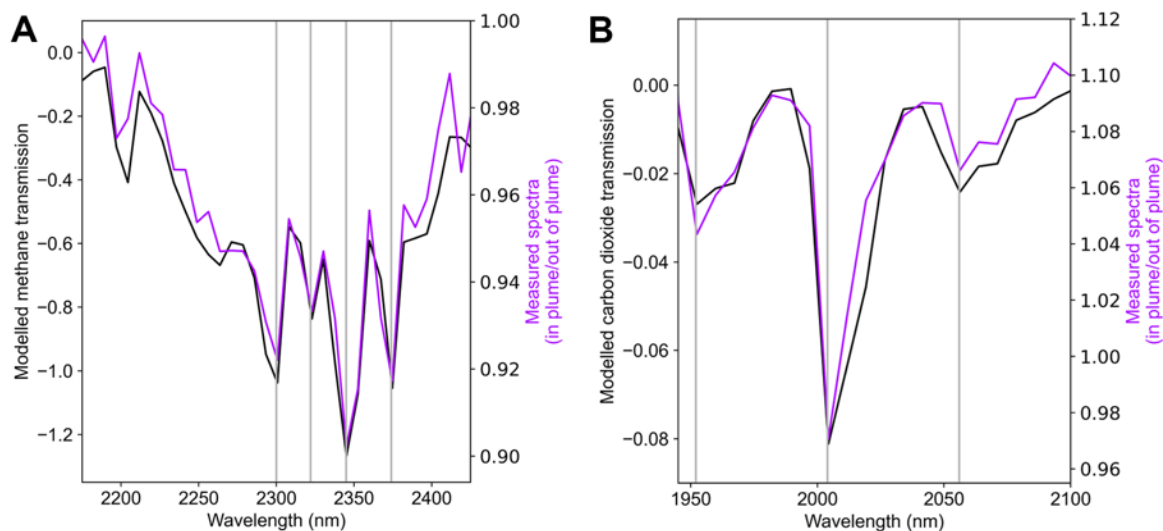

Fig. S1. **Methane and carbon dioxide spectral fingerprints with excellent agreement with modelled gas transmission.** Examples of methane (A) and carbon dioxide (B) spectral fingerprints (purple lines) and modeled gas transmission (black line). The strongest absorption features highlighted by the vertical gray lines.

### Supplement 2. Methane and carbon dioxide plume list

The plume examples presented in this study are available through the EMIT applications online mapping tool (<https://earth.jpl.nasa.gov/data/data-portal/Greenhouse-Gases>) with periodic updates reflecting additional observed emissions. A summary of those methane and carbon dioxide plume described in this study are provided in the table below, including the date and time of the EMIT acquisition and the location of the estimated plume origins. EMIT radiance data are available through the Land Processes Distributed Active Archive Center (LP DAAC) at the following link, <https://lpdaac.usgs.gov/products/emitl1bradv001>.

**Table S1: Summary of observed plumes**

| EMIT acquisition    | Acquisition date (mm/dd/yyyy) | Acquisition time (UTC) | Estimated plume origin latitude | Estimated plume origin longitude | Gas     |
|---------------------|-------------------------------|------------------------|---------------------------------|----------------------------------|---------|
| emit20220811t042630 | 08/11/2022                    | 04:26:30               | 22.323                          | 56.409                           | Methane |
| emit20220814t051412 | 08/14/2022                    | 05:14:12               | 34.892                          | 41.149                           | Methane |
| emit20220814t083654 | 08/14/2022                    | 08:36:54               | 47.000                          | 79.982                           | Methane |
| emit20220815t042838 | 08/15/2022                    | 04:28:38               | 39.469                          | 53.645                           | Methane |
| emit20220815t042838 | 08/15/2022                    | 04:28:38               | 39.477                          | 53.665                           | Methane |
| emit20220815t042838 | 08/15/2022                    | 04:28:38               | 39.464                          | 53.777                           | Methane |
| emit20220815t042838 | 08/15/2022                    | 04:28:38               | 39.447                          | 53.793                           | Methane |
| emit20220815t042838 | 08/15/2022                    | 04:28:38               | 39.361                          | 53.767                           | Methane |
| emit20220815t042838 | 08/15/2022                    | 04:28:38               | 39.374                          | 53.831                           | Methane |
| emit20220815t042838 | 08/15/2022                    | 04:28:38               | 39.347                          | 53.875                           | Methane |
| emit20220815t042838 | 08/15/2022                    | 04:28:38               | 39.444                          | 53.817                           | Methane |
| emit20220815t042838 | 08/15/2022                    | 04:28:38               | 39.355                          | 53.877                           | Methane |
| emit20220815t042838 | 08/15/2022                    | 04:28:38               | 39.378                          | 53.835                           | Methane |
| emit20220815t042838 | 08/15/2022                    | 04:28:38               | 39.360                          | 53.801                           | Methane |
| emit20220815t042838 | 08/15/2022                    | 04:28:38               | 39.478                          | 53.734                           | Methane |
| emit20220815t043235 | 08/15/2022                    | 04:32:35               | 47.692                          | 71.330                           | Methane |
| emit20220815t074645 | 08/15/2022                    | 07:46:45               | 49.909                          | 72.217                           | Methane |
| emit20220815t105833 | 08/15/2022                    | 10:58:33               | 39.470                          | 53.645                           | Methane |
| emit20220815t105833 | 08/15/2022                    | 10:58:33               | 39.476                          | 53.665                           | Methane |
| emit20220815t105833 | 08/15/2022                    | 10:58:33               | 39.463                          | 53.776                           | Methane |
| emit20220815t105833 | 08/15/2022                    | 10:58:33               | 39.448                          | 53.793                           | Methane |
| emit20220815t105833 | 08/15/2022                    | 10:58:33               | 39.361                          | 53.767                           | Methane |
| emit20220815t105833 | 08/15/2022                    | 10:58:33               | 39.375                          | 53.831                           | Methane |
| emit20220815t105833 | 08/15/2022                    | 10:58:33               | 39.347                          | 53.875                           | Methane |
| emit20220816t034409 | 08/16/2022                    | 03:44:09               | 45.996                          | 72.706                           | Methane |
| emit20220816t051839 | 08/16/2022                    | 05:18:39               | 48.555                          | 58.090                           | Methane |
| emit20220816t051839 | 08/16/2022                    | 05:18:39               | 48.548                          | 58.057                           | Methane |
| emit20220816t101035 | 08/16/2022                    | 10:10:35               | 40.421                          | 58.192                           | Methane |
| emit20220816t101058 | 08/16/2022                    | 10:10:58               | 39.681                          | 60.206                           | Methane |
| emit20220816t101058 | 08/16/2022                    | 10:10:58               | 39.675                          | 60.196                           | Methane |
| emit20220816t101058 | 08/16/2022                    | 10:10:58               | 39.668                          | 60.204                           | Methane |
| emit20220816t101058 | 08/16/2022                    | 10:10:58               | 39.659                          | 60.183                           | Methane |
| emit20220816t101158 | 08/16/2022                    | 10:11:58               | 37.098                          | 63.645                           | Methane |
| emit20220818t034231 | 08/18/2022                    | 03:42:31               | 46.548                          | 64.666                           | Methane |
| emit20220818t083506 | 08/18/2022                    | 08:35:06               | 41.633                          | 69.540                           | Methane |
| emit20220818t083506 | 08/18/2022                    | 08:35:06               | 41.097                          | 69.486                           | Methane |

|                     |            |          |        |        |         |
|---------------------|------------|----------|--------|--------|---------|
| emit20220819t043116 | 08/19/2022 | 04:31:16 | 51.118 | 66.358 | Methane |
| emit20220819t092231 | 08/19/2022 | 09:22:31 | 36.232 | 59.982 | Methane |
| emit20220820t083324 | 08/20/2022 | 08:33:24 | 39.746 | 60.289 | Methane |
| emit20220820t083324 | 08/20/2022 | 08:33:24 | 39.482 | 60.747 | Methane |
| emit20220820t083324 | 08/20/2022 | 08:33:24 | 39.946 | 61.005 | Methane |
| emit20220820t083324 | 08/20/2022 | 08:33:24 | 40.047 | 61.045 | Methane |
| emit20220820t083411 | 08/20/2022 | 08:34:11 | 37.581 | 63.571 | Methane |
| emit20220822t065713 | 08/22/2022 | 06:57:13 | 41.633 | 69.540 | Methane |
| emit20220823t074504 | 08/23/2022 | 07:45:04 | 36.210 | 61.521 | Methane |
| emit20220823t074504 | 08/23/2022 | 07:45:04 | 35.978 | 61.915 | Methane |
| emit20220823t074504 | 08/23/2022 | 07:45:04 | 36.207 | 61.578 | Methane |
| emit20220823t074504 | 08/23/2022 | 07:45:04 | 35.837 | 61.946 | Methane |
| emit20220823t074504 | 08/23/2022 | 07:45:04 | 36.005 | 61.676 | Methane |
| emit20220823t074515 | 08/23/2022 | 07:45:15 | 35.247 | 62.270 | Methane |
| emit20220823t091950 | 08/23/2022 | 09:19:50 | 30.529 | 44.553 | Methane |
| emit20220826t065435 | 08/26/2022 | 06:54:35 | 37.924 | 53.900 | Methane |
| emit20220826t065435 | 08/26/2022 | 06:54:35 | 37.903 | 53.890 | Methane |
| emit20220826t065435 | 08/26/2022 | 06:54:35 | 37.749 | 53.934 | Methane |
| emit20220826t065435 | 08/26/2022 | 06:54:35 | 37.891 | 53.908 | Methane |
| emit20220826t082915 | 08/26/2022 | 08:29:15 | 33.331 | 36.444 | Methane |
| emit20220827t060619 | 08/27/2022 | 06:06:19 | 39.538 | 56.138 | Methane |
| emit20220827t060619 | 08/27/2022 | 06:06:19 | 40.109 | 56.273 | Methane |
| emit20220827t060642 | 08/27/2022 | 06:06:42 | 39.521 | 57.582 | Methane |
| emit20220827t060642 | 08/27/2022 | 06:06:42 | 39.527 | 57.515 | Methane |
| emit20220827t060642 | 08/27/2022 | 06:06:42 | 39.599 | 57.352 | Methane |
| emit20220827t060642 | 08/27/2022 | 06:06:42 | 39.158 | 57.194 | Methane |
| emit20220827t060642 | 08/27/2022 | 06:06:42 | 39.211 | 57.089 | Methane |
| emit20220827t060654 | 08/27/2022 | 06:06:54 | 38.179 | 58.356 | Methane |
| emit20220827t060730 | 08/27/2022 | 06:07:30 | 37.341 | 60.485 | Methane |
| emit20220827t060753 | 08/27/2022 | 06:07:53 | 36.419 | 61.543 | Methane |
| emit20220827t060753 | 08/27/2022 | 06:07:53 | 36.407 | 61.559 | Methane |
| emit20220827t060753 | 08/27/2022 | 06:07:53 | 36.379 | 61.918 | Methane |
| emit20220827t060753 | 08/27/2022 | 06:07:53 | 36.490 | 61.623 | Methane |
| emit20220827t060753 | 08/27/2022 | 06:07:53 | 36.476 | 61.623 | Methane |
| emit20220827t060753 | 08/27/2022 | 06:07:53 | 36.575 | 61.473 | Methane |
| emit20220827t060753 | 08/27/2022 | 06:07:53 | 36.526 | 61.663 | Methane |
| emit20220827t060753 | 08/27/2022 | 06:07:53 | 36.510 | 61.660 | Methane |
| emit20220827t060753 | 08/27/2022 | 06:07:53 | 36.502 | 61.673 | Methane |
| emit20220827t060753 | 08/27/2022 | 06:07:53 | 36.501 | 61.696 | Methane |

|                     |            |          |        |        |         |
|---------------------|------------|----------|--------|--------|---------|
| emit20220827t060753 | 08/27/2022 | 06:07:53 | 36.484 | 61.632 | Methane |
| emit20220827t060753 | 08/27/2022 | 06:07:53 | 36.478 | 61.637 | Methane |
| emit20220827t060753 | 08/27/2022 | 06:07:53 | 36.402 | 61.577 | Methane |
| emit20220827t060753 | 08/27/2022 | 06:07:53 | 36.393 | 61.566 | Methane |
| emit20220827t060753 | 08/27/2022 | 06:07:53 | 36.372 | 61.557 | Methane |
| emit20220827t060753 | 08/27/2022 | 06:07:53 | 36.472 | 61.458 | Methane |
| emit20220827t060753 | 08/27/2022 | 06:07:53 | 36.632 | 61.641 | Methane |
| emit20220828t051853 | 08/28/2022 | 05:18:53 | 39.974 | 61.681 | Methane |
| emit20220828t051905 | 08/28/2022 | 05:19:05 | 39.934 | 62.368 | Methane |
| emit20220828t051905 | 08/28/2022 | 05:19:05 | 40.050 | 62.598 | Methane |
| emit20220828t051917 | 08/28/2022 | 05:19:17 | 39.136 | 63.263 | Methane |
| emit20220828t051929 | 08/28/2022 | 05:19:29 | 39.018 | 64.072 | Methane |
| emit20220828t051929 | 08/28/2022 | 05:19:29 | 39.013 | 64.094 | Methane |
| emit20220828t051941 | 08/28/2022 | 05:19:41 | 38.733 | 64.617 | Methane |
| emit20220828t051941 | 08/28/2022 | 05:19:41 | 38.662 | 64.775 | Methane |
| emit20220828t051941 | 08/28/2022 | 05:19:41 | 38.786 | 64.637 | Methane |
| emit20220828t051941 | 08/28/2022 | 05:19:41 | 38.787 | 64.621 | Methane |
| emit20220828t051941 | 08/28/2022 | 05:19:41 | 38.801 | 64.645 | Methane |
| emit20220828t065300 | 08/28/2022 | 06:53:00 | 36.975 | 42.814 | Methane |
| emit20220828t065324 | 08/28/2022 | 06:53:24 | 36.187 | 43.887 | Methane |
| emit20220828t065550 | 08/28/2022 | 06:55:50 | 30.063 | 51.551 | Methane |
| emit20220829t060627 | 08/29/2022 | 06:06:27 | 35.459 | 51.327 | Methane |
| emit20220829t060913 | 08/29/2022 | 06:09:13 | 27.390 | 60.255 | Methane |
| emit20220829t060913 | 08/29/2022 | 06:09:13 | 27.262 | 60.694 | Methane |
| emit20220830t065244 | 08/30/2022 | 06:52:44 | 33.324 | 36.443 | Methane |
| emit20220831t060702 | 08/31/2022 | 06:07:02 | 29.049 | 47.586 | Methane |
| emit20220831t060702 | 08/31/2022 | 06:07:02 | 28.956 | 47.962 | Methane |
| emit20220831t060702 | 08/31/2022 | 06:07:02 | 29.169 | 47.924 | Methane |
| emit20220901t034318 | 09/01/2022 | 03:43:18 | 38.561 | 65.950 | Methane |
| emit20220901t034318 | 09/01/2022 | 03:43:18 | 38.313 | 66.071 | Methane |
| emit20220901t034318 | 09/01/2022 | 03:43:18 | 38.483 | 65.990 | Methane |
| emit20220901t034318 | 09/01/2022 | 03:43:18 | 38.497 | 66.011 | Methane |
| emit20220901t034318 | 09/01/2022 | 03:43:18 | 38.516 | 66.002 | Methane |
| emit20220901t034318 | 09/01/2022 | 03:43:18 | 38.542 | 66.004 | Methane |
| emit20220901t034318 | 09/01/2022 | 03:43:18 | 38.536 | 65.950 | Methane |
| emit20220901t034318 | 09/01/2022 | 03:43:18 | 38.533 | 65.927 | Methane |
| emit20220901t034318 | 09/01/2022 | 03:43:18 | 38.537 | 65.890 | Methane |
| emit20220901t034318 | 09/01/2022 | 03:43:18 | 38.521 | 65.883 | Methane |
| emit20220901t051709 | 09/01/2022 | 05:17:09 | 35.482 | 45.447 | Methane |

|                     |            |          |        |        |                |
|---------------------|------------|----------|--------|--------|----------------|
| emit20220901t051720 | 09/01/2022 | 05:17:20 | 35.180 | 47.010 | Methane        |
| emit20220901t051920 | 09/01/2022 | 05:19:20 | 29.740 | 53.248 | Methane        |
| emit20220901t051932 | 09/01/2022 | 05:19:32 | 29.737 | 53.251 | Methane        |
| emit20220901t052019 | 09/01/2022 | 05:20:19 | 27.182 | 56.078 | Methane        |
| emit20220901t052019 | 09/01/2022 | 05:20:19 | 27.114 | 55.986 | Methane        |
| emit20220903t051924 | 09/03/2022 | 05:19:24 | 24.413 | 47.019 | Methane        |
| emit20220903t051924 | 09/03/2022 | 05:19:24 | 24.537 | 46.894 | Methane        |
| emit20220903t051924 | 09/03/2022 | 05:19:24 | 24.609 | 46.896 | Methane        |
| emit20220903t051924 | 09/03/2022 | 05:19:24 | 24.489 | 46.942 | Methane        |
| emit20220815t025827 | 08/15/2022 | 02:58:27 | 44.898 | 89.042 | Carbon dioxide |
| emit20220815t025827 | 08/15/2022 | 02:58:27 | 44.864 | 89.009 | Carbon dioxide |
| emit20220903t051924 | 09/03/2022 | 05:19:24 | 24.413 | 47.012 | Carbon dioxide |
